# Supplementary material for: Preparation and characterization of temperature/pH/CO2-triple-responsive homopolymers and their substituent determined response
Source: Royal Society of Chemistry journal article supplement (doi:10.1039/d4py00509k), 2024-01-01
Supplement: d4py00509k1.pdf [file d4py00509k1.pdf]

## Supporting Information for

### Preparation and Characterization of Temperature/pH/CO<sub>2</sub>-Triple-Responsive Homopolymers and Their Substituents Determined Response

Ke Wang<sup>a,\*</sup>, Zilong Wang<sup>a</sup>, Meiyu Si<sup>a</sup>, Xiaofang Liu, Guiyan Liu<sup>a</sup>, Yongfei Zeng<sup>a,\*</sup>

<sup>a</sup> Tianjin Key Laboratory of Structure and Performance for Functional Molecules, College of Chemistry, Tianjin Normal University, Tianjin, 300387, China. E-mail: [kewang@tjnu.edu.cn](mailto:kewang@tjnu.edu.cn), [yfzeng@nankai.edu.cn](mailto:yfzeng@nankai.edu.cn).

### Characterization

<sup>1</sup>H NMR and <sup>13</sup>C NMR spectra were tested by a Bruker Avance NEO 400MHz NMR spectrometer. Agilent PL-GPC50 (eluent: THF) was used to test the molecular weight and polydispersity index. Fourier transform infrared spectra were tested on a Nicolet IR200 FT-IR spectrometer using KBr-pellet. Transmission electron microscopy (TEM) images were tested using FEI TECNAI G2 F20 (200 kV). LCST, UCST and critical pH were tested on a UH-4150 UV-vis spectrophotometer equipped with a thermoregulator ( $\pm 0.1$  °C) at 500 nm. A NanoBrook Omni laser light scattering spectrometer was applied for dynamic light scattering (DLS) analysis. The fluorescence spectrum was observed by using a HITA CHI F-4600 fluorescence spectrophotometer.

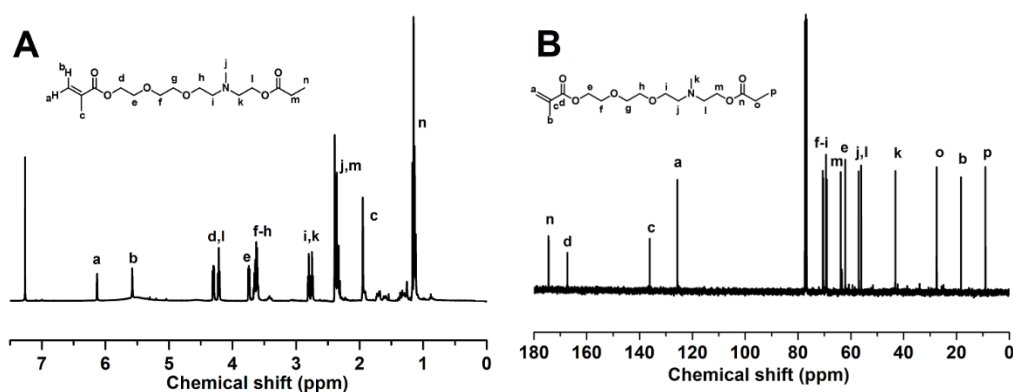

**Figure S1.** The  $^1\text{H}$  NMR spectra (A) and  $^{13}\text{C}$  NMR spectra (B) of Et-N-EO<sub>2</sub>MA in CDCl<sub>3</sub>.

$^1\text{H}$  NMR (400 MHz, CDCl<sub>3</sub>): $\delta$  6.13 (s, 1H), 5.60 – 5.56 (m, 1H), 4.30 (dd,  $J$  = 5.5, 4.3 Hz, 2H), 4.22 (t,  $J$  = 5.8 Hz, 2H), 3.74 (dd,  $J$  = 5.5, 4.3 Hz, 2H), 3.69 – 3.56 (m, 6H), 2.80 (t,  $J$  = 5.8 Hz, 2H), 2.75 (t,  $J$  = 5.8 Hz, 2H), 2.42 – 2.28 (m, 5H), 1.95 (s, 3H), 1.15 (t,  $J$  = 4.4 Hz, 3H).  $^{13}\text{C}$  NMR (101 MHz, CDCl<sub>3</sub>): $\delta$  174.4, 167.3, 136.1, 125.7, 70.7, 70.0, 69.4, 69.1, 63.8, 63.4, 43.1, 27.4, 18.2, 9.0.

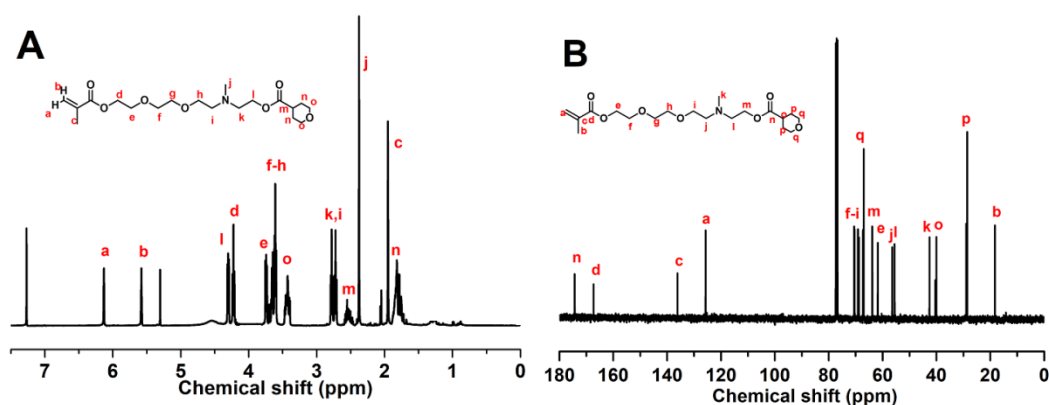

**Figure S2.** The  $^1\text{H}$  NMR spectra (A) and  $^{13}\text{C}$  NMR spectra (B) of THP-N-EO<sub>2</sub>MA in CDCl<sub>3</sub>.

$^1\text{H}$  NMR (400 MHz, CDCl<sub>3</sub>): $\delta$  6.13 (s, 1H), 5.63 – 5.53 (m, 1H), 4.34 – 4.27 (m, 2H), 4.22 (t,  $J$  = 5.9 Hz, 2H), 3.78 – 3.71 (m, 2H), 3.64 (ddd,  $J$  = 15.2, 8.0, 4.4 Hz, 6H), 3.43 (tdd,  $J$  = 11.4, 5.8, 2.8 Hz, 4H), 2.78 (t,  $J$  = 5.8 Hz, 2H), 2.78 (t,  $J$  = 5.8 Hz, 2H), 2.38 (s, 3H), 1.95 (s, 3H), 1.87 – 1.75 (m, 4H).  $^{13}\text{C}$  NMR (101 MHz, CDCl<sub>3</sub>):  $\delta$  178.2, 174.3, 136.1, 125.7, 70.5, 69.1, 68.8, 67.2, 67.0, 63.8, 61.7, 56.4, 55.5, 42.6, 40.4, 28.6, 18.3.

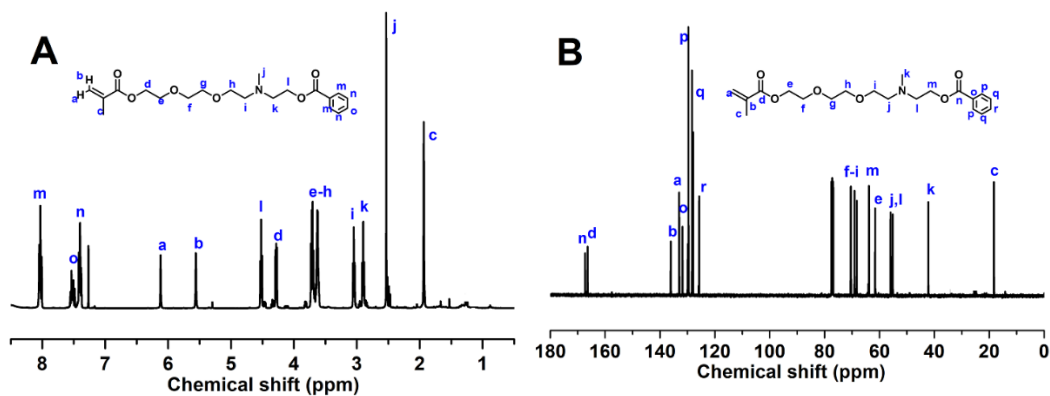

**Figure S3.** The  $^1\text{H}$  NMR spectra (A) and  $^{13}\text{C}$  NMR spectra (B) of Ph-N-EO<sub>2</sub>MA in  $\text{CDCl}_3$ .

$^1\text{H}$  NMR (400 MHz,  $\text{CDCl}_3$ ):  $\delta$  8.03 (tt,  $J = 8.4, 1.8$  Hz, 2H), 7.62 – 7.45 (m, 1H), 7.40 (ddd,  $J = 7.4, 5.8, 1.9$  Hz, 2H), 6.12 (s, 1H), 5.62 – 5.48 (m, 1H), 4.56 – 4.41 (m, 2H), 4.33 – 4.24 (m, 2H), 3.76 – 3.51 (m, 8H), 2.94 (t,  $J = 5.6$  Hz, 3H), 2.90 (t,  $J = 5.6$  Hz, 3H), 2.56 (s, 3H), 1.98 (s, 3H).  $^{13}\text{C}$  NMR (101 MHz,  $\text{CDCl}_3$ ):  $\delta$  170.5, 167.2, 136.1, 132.9, 131.7, 129.9, 129.6, 128.3, 70.4, 69.1, 68.2, 63.8, 61.6, 56.0, 55.2, 42.2, 18.2.

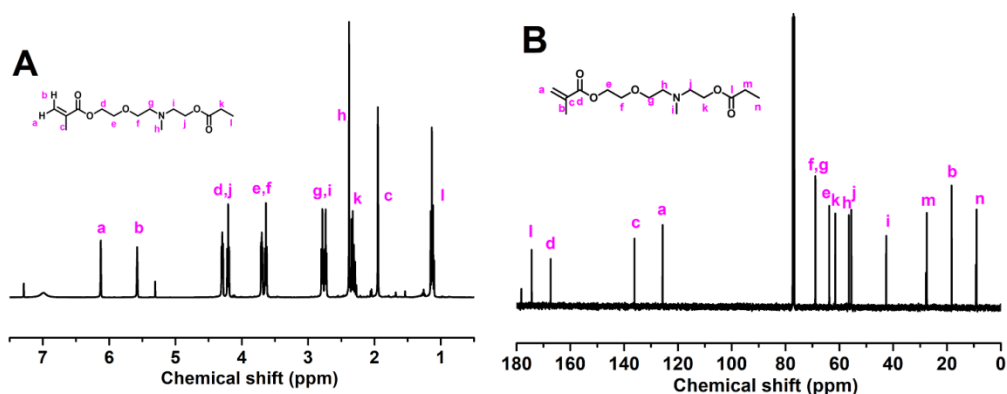

**Figure S4.** The  $^1\text{H}$  NMR spectra (A) and  $^{13}\text{C}$  NMR spectra (B) of Et-N-EOMA in  $\text{CDCl}_3$ .

$^1\text{H}$  NMR (400 MHz,  $\text{CDCl}_3$ )  $\delta$  6.13 (s, 1H), 5.58 (s, 1H), 4.36 – 4.26 (m, 2H), 4.21 (t,  $J = 5.8$  Hz, 2H), 3.74 – 3.68 (m, 2H), 3.64 (t,  $J = 5.6$  Hz, 2H), 2.79 (t,  $J = 5.8$

Hz, 2H), 2.74 (t,  $J = 5.6$  Hz, 2H), 2.38 (s, 3H), 2.37 – 2.26 (m, 2H), 1.95 (s, 3H).  $^{13}\text{C}$  NMR (101 MHz,  $\text{CDCl}_3$ )  $\delta$ 174.3, 167.3, 136.1, 125.7, 68.9, 63.7, 61.5, 56.4, 55.5, 42.6, 27.5, 18.2, 9.2.

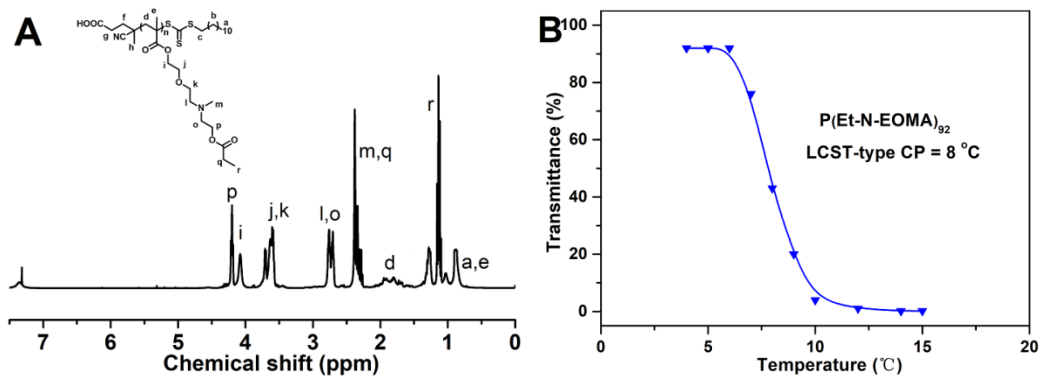

**Figure S5.** The  $^1\text{H}$  NMR spectra of P(Et-N-EOMA) in  $\text{CDCl}_3$  (A) and thermoresponse of 1.0 wt % aqueous solutions of P(Et-N-EOMA) $_{92}$  (B).

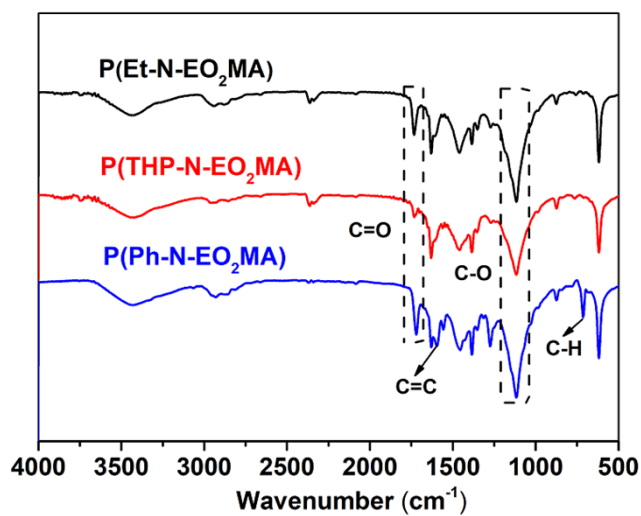

**Figure S6.** The FT-IR spectra of P(Et-N-EO $_2$ MA), P(THP-N-EO $_2$ MA) and P(Ph-N-EO $_2$ MA).

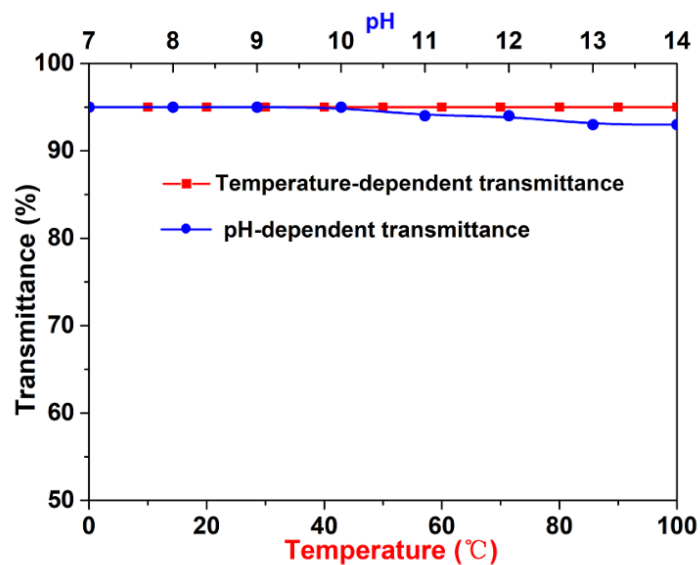

**Figure S7.** The temperature and pH-dependent transmittance of the 1.0 wt% aqueous solution of P(THP-N-EO<sub>2</sub>MA).

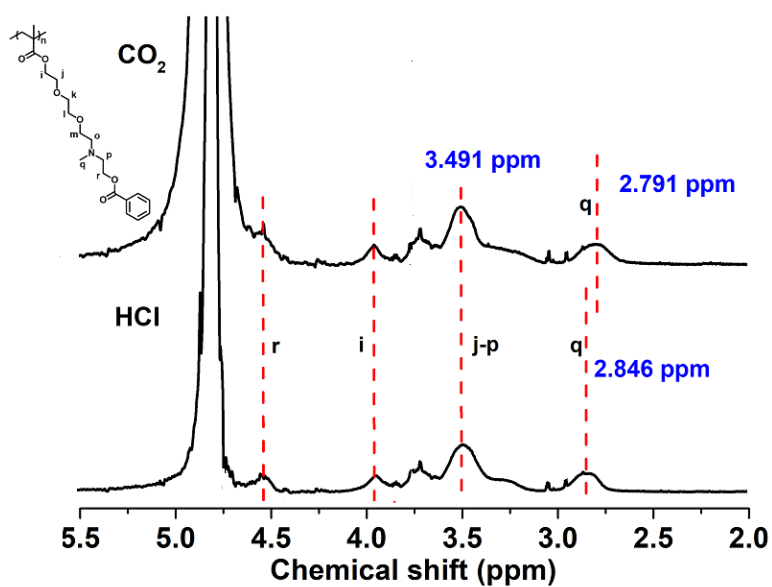

**Figure S8** <sup>1</sup>H NMR spectra of P(Ph-N-EO<sub>2</sub>MA) after adding acid and bubbling CO<sub>2</sub>. (pH=5.8).

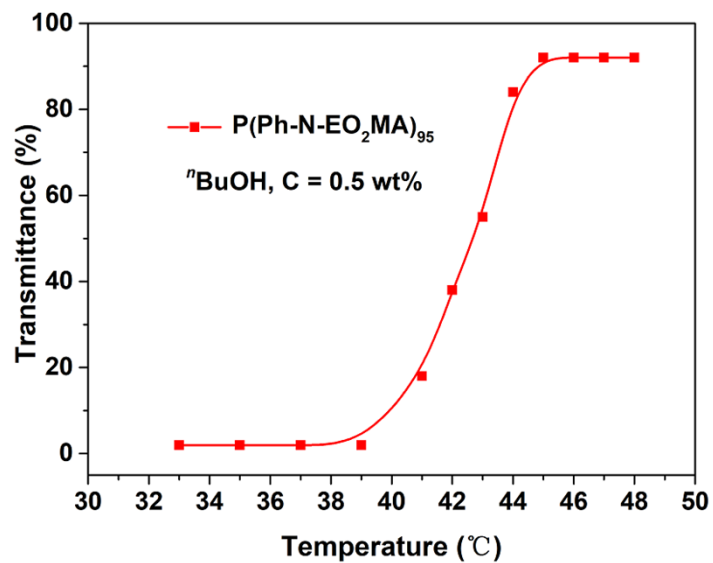

**Figure S9.** Thermoresponse of P(Ph-N-EO<sub>2</sub>MA)<sub>95</sub> in *n*BuOH (0.5 wt%).

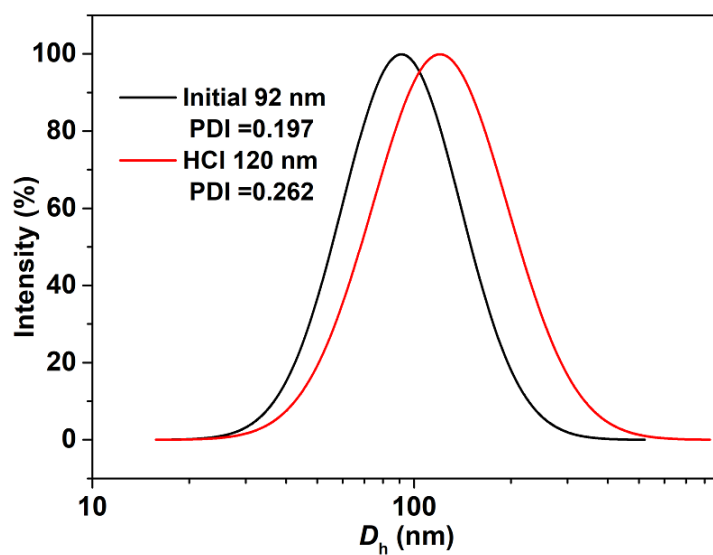

**Figure S10.** The  $D_h$  of micelles of P(Ph-N-EO<sub>2</sub>MA) and after treatment with HCl.
